# Supplementary material for: Immobilization in External Rotation and Abduction Versus Arthroscopic Stabilization After First-Time Anterior Shoulder Dislocation: A Multicenter Randomized Controlled Trial
Source: PubMed Central journal article supplement — Am J Sports Med. 2021 Feb 17;49(4):857–65. doi: 10.1177/0363546520987823 (PMC7961655; doi:10.1177/0363546520987823), 2021-02-17
Supplement: sj-pdf-1-ajs-10.1177_0363546520987823.pdf [file sj-pdf-1-ajs-10.1177_0363546520987823.pdf]

Center for Muskuloskeletal Surgery (CMSC)  
Department for Shoulder and Elbow Surgery

### **Rehabilitation Protocol**

**Group 1** Immobilization in 60 ° external rotation and 30° abduction (Bledsoe ARC XR brace) for 3 weeks post shoulder dislocation

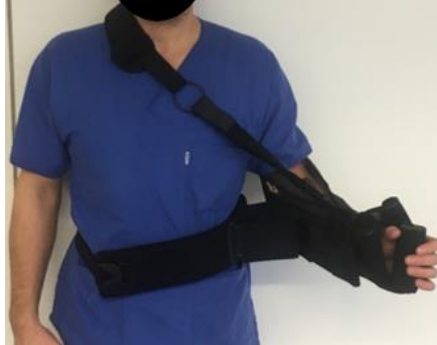

**Group 2** Immobilization in internal rotation (shoulder immobilizer) for 3 weeks postoperative

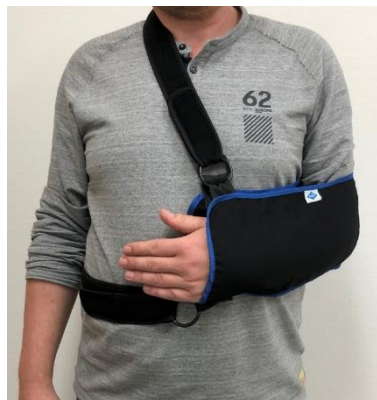

**Week 1-3:**

- Isometric exercises with active centralization of the humeral head
- Lymphatic drainage and cryotherapy
- From week 2 on heat therapy (fango) if applicable

**Week 4-6:**

- Passive mobilization: up to 90° anteversion, 90° abduction, free internal rotation, external rotation limited to 60° for group 1 and 0° for group 2
- Beginning with active assisted mobilization and exercises without lifting

**From week 7 on:**

- Mobilization without limits for ROM according to patient symptoms
- therapeutic bathing is possible
- exercises in a closed chain for strengthening of the rotator cuff, deltoid muscle and scapulothoracic muscles
- coordination exercises using PNF

**From week 12 on:** - sports specific training and exercises

**Return to sports after 6 months**
